# Supplementary material for: Psycho-Linguistic Changes Associated With Historical Celebrities in Henan Using Classical Chinese Big Data
Source: Frontiers journal article supplement (doi:10.3389/fpsyg.2021.648677), 2021-09-14
Supplement: Data_Sheet_1.PDF [file Data_Sheet_1.PDF]

## *Supplementary Material*

### 1 Appendix I Details of the selection process of historical celebrities

| The serial number | Birth history | Names of historical celebrities | The number of occurrences among the three choice sources | Total words of text (TCC) | The total number of words in the text <300 will be deleted | Only one in dynasty was removed | Final choice |
|-------------------|---------------|---------------------------------|----------------------------------------------------------|---------------------------|------------------------------------------------------------|---------------------------------|--------------|
| 1                 | 1             | Lao tze                         | 2                                                        | 8735                      |                                                            |                                 | 1            |
| 2                 | 1             | Zi gong                         | 2                                                        | 952                       |                                                            |                                 | 1            |
| 3                 | 1             | Mozi                            | 2                                                        | 11899                     |                                                            |                                 | 1            |
| 4                 | 1             | Fan li                          | 3                                                        | 629                       |                                                            |                                 | 1            |
| 5                 | 1             | Shu in                          | 3                                                        | 7309                      |                                                            |                                 | 1            |
| 6                 | 1             | Zhang Yi                        | 2                                                        | 5039                      |                                                            |                                 | 1            |
| 7                 | 1             | Zi chan                         | 2                                                        | 2416                      |                                                            |                                 | 1            |
| 8                 | 1             | Zhuangzi                        | 3                                                        | 3057                      |                                                            |                                 | 1            |
| 9                 | 1             | Lv buwei                        | 3                                                        | 544                       |                                                            |                                 | 1            |
| 10                | 1             | Han fei                         | 3                                                        | 67701                     |                                                            |                                 | 1            |
| 11                | 1             | Shang Yang                      | 3                                                        | 670                       |                                                            |                                 | 1            |
| 12                | 2             | Chen ping                       | 3                                                        | 593                       |                                                            |                                 | 1            |
| 13                | 2             | Zhang liang                     | 2                                                        | 993                       |                                                            |                                 | 1            |
| 14                | 2             | ChaoCuo                         | 3                                                        | 4310                      |                                                            |                                 | 1            |
| 15                | 2             | Zhang shizhi                    | 3                                                        | 315                       |                                                            |                                 | 1            |
| 16                | 2             | Jia yi                          | 3                                                        | 7335                      |                                                            |                                 | 1            |
| 17                | 2             | Feng yi                         | 3                                                        | 443                       |                                                            |                                 | 1            |
| 18                | 2             | Yuan shao                       | 3                                                        | 1340                      |                                                            |                                 | 1            |
| 19                | 2             | Xun you                         | 2                                                        | 334                       |                                                            |                                 | 1            |
| 20                | 2             | Xun yu                          | 3                                                        | 1317                      |                                                            |                                 | 1            |
| 21                | 2             | Cai yong                        | 3                                                        | 2928                      |                                                            |                                 | 1            |
| 22                | 2             | Zhang heng                      | 3                                                        | 1058                      |                                                            |                                 | 1            |
| 23                | 3             | Sima yi                         | 3                                                        | 1041                      |                                                            |                                 | 1            |
| 24                | 3             | Deng ai                         | 3                                                        | 954                       |                                                            |                                 | 1            |
| 25                | 3             | Ruan ji                         | 3                                                        | 1034                      |                                                            |                                 | 1            |
| 26                | 3             | Zhong yao                       | 3                                                        | 394                       |                                                            |                                 | 1            |
| 27                | 3             | Wang jun                        | 2                                                        | 442                       |                                                            |                                 | 1            |
| 28                | 3             | Xie xuan                        | 2                                                        | 785                       |                                                            |                                 | 1            |
| 29                | 3             | Pan yue                         | 3                                                        | 440                       |                                                            |                                 | 1            |
| 30                | 3             | Xie lingyun                     | 3                                                        | 310                       |                                                            |                                 | 1            |
| 31                | 3             | Fan ye                          | 3                                                        | 377                       |                                                            |                                 | 1            |
| 32                | 3             | Fan zhen                        | 3                                                        | 1291                      |                                                            |                                 | 1            |
| 33                | 3             | Jiang yan                       | 3                                                        | 956                       |                                                            |                                 | 1            |

|    |     |                 |   |       |   |  |   |
|----|-----|-----------------|---|-------|---|--|---|
| 34 | 4   | Yao chong       | 3 | 992   |   |  | 1 |
| 35 | 4   | Liu rengui      | 2 | 360   |   |  | 1 |
| 36 | 4   | Wu jing         | 2 | 1380  |   |  | 1 |
| 37 | 4   | Zhang xun       | 2 | 396   |   |  | 1 |
| 38 | 4   | Zhang shuo      | 2 | 1021  |   |  | 1 |
| 39 | 4   | Bai juyi        | 2 | 10554 |   |  | 1 |
| 40 | 4   | Yuan jie        | 3 | 1328  |   |  | 1 |
| 41 | 4   | Han yu          | 3 | 3059  |   |  | 1 |
| 42 | 4   | Liu yuxi        | 3 | 302   |   |  | 1 |
| 43 | 4   | Wang jian       | 2 | 397   |   |  | 1 |
| 44 | 4   | Yuan zhen       | 3 | 2613  |   |  | 1 |
| 45 | 5   | Zhao pu         | 3 | 852   |   |  | 1 |
| 46 | 5   | Sima guang      | 2 | 5498  |   |  | 1 |
| 47 | 5   | Yue fei         | 3 | 1841  |   |  | 1 |
| 48 | 0   | Fuxi            | 2 | 0     | 1 |  |   |
| 49 | 0   | Huangdi         | 2 | 0     | 1 |  |   |
| 50 | 0   | Yiyi            | 2 | 0     | 1 |  |   |
| 51 | 0   | Bigan           | 3 | 0     | 1 |  |   |
| 52 | 0   | Jiangshang      | 2 | 0     | 1 |  |   |
| 53 | 1   | Shen zhuliang   | 2 | 0     | 1 |  |   |
| 54 | 1   | Hui shi         | 2 | 143   | 1 |  |   |
| 55 | 1   | Baili xi        | 2 | 0     | 1 |  |   |
| 56 | 1   | Sunshu ao       | 3 | 88    | 1 |  |   |
| 57 | 1   | Wei liao        | 2 | 0     | 1 |  |   |
| 58 | 1   | Shen buhai      | 3 | 0     | 1 |  |   |
| 59 | QIN | Chen sheng      | 3 | 177   | 1 |  |   |
| 60 | QIN | Wu guang        | 3 | 0     | 1 |  |   |
| 61 | 2   | Li shiqi        | 2 | 0     | 1 |  |   |
| 62 | 2   | Guan ying       | 3 | 0     | 1 |  |   |
| 63 | 2   | Zhang cang      | 3 | 0     | 1 |  |   |
| 64 | 2   | Sang hongyang   | 3 | 0     | 1 |  |   |
| 65 | 2   | Heng kuan       | 2 | 0     | 1 |  |   |
| 66 | 2   | Yao qi          | 2 | 93    | 1 |  |   |
| 67 | 2   | Deng yu         | 2 | 245   | 1 |  |   |
| 68 | 2   | Chen fan        | 3 | 0     | 1 |  |   |
| 69 | 2   | Yuan shao       | 3 | 215   | 1 |  |   |
| 70 | 2   | Guo jia         | 3 | 0     | 1 |  |   |
| 71 | 2   | Xun yue         | 2 | 0     | 1 |  |   |
| 72 | 2   | Xu shen         | 3 | 0     | 1 |  |   |
| 73 | 2   | Cai wenji       | 3 | 0     | 1 |  |   |
| 74 | 2   | Du shi          | 3 | 0     | 1 |  |   |
| 75 | 2   | Zhang zhongjing | 2 | 0     | 1 |  |   |
| 76 | 2   | Li ying         | 2 | 0     | 1 |  |   |
| 77 | 2   | Chen yu         | 2 | 0     | 1 |  |   |
| 78 | 3   | Huang zhong     | 2 | 0     | 1 |  |   |

|     |      |                 |   |      |   |   |  |
|-----|------|-----------------|---|------|---|---|--|
| 79  | 3    | Chen qun        | 2 | 0    | 1 |   |  |
| 80  | 3    | He yan          | 2 | 0    | 1 |   |  |
| 81  | 3    | Wang bi         | 2 | 0    | 1 |   |  |
| 82  | 3    | Xie an          | 3 | 196  | 1 |   |  |
| 83  | 3    | Xiang xiu       | 2 | 292  | 1 |   |  |
| 84  | 3    | Guo xiang       | 2 | 0    | 1 |   |  |
| 85  | 3    | Gan bao         | 3 | 0    | 1 |   |  |
| 86  | 3    | Xie daoyun      | 2 | 0    | 1 |   |  |
| 87  | 3    | Zhong rong      | 3 | 203  | 1 |   |  |
| 88  | 3    | Yu xin          | 3 | 0    | 1 |   |  |
| 89  | SUI  | Han qinhu       | 3 | 114  | 1 |   |  |
| 90  | SUI  | Zhai rang       | 3 | 0    | 1 |   |  |
| 91  | 4    | Xuan zang       | 3 | 0    | 1 |   |  |
| 92  | 4    | Li yanshou      | 3 | 0    | 1 |   |  |
| 93  | 4    | Shangguan yi    | 3 | 62   | 1 |   |  |
| 94  | 4    | Shangguan waner | 2 | 0    | 1 |   |  |
| 95  | 4    | Liu xiyi        | 2 | 0    | 1 |   |  |
| 96  | 4    | Cen sen         | 2 | 0    | 1 |   |  |
| 97  | 4    | Du shenyan      | 2 | 99   | 1 |   |  |
| 98  | 4    | Cui hao         | 3 | 0    | 1 |   |  |
| 99  | 4    | Du fu           | 3 | 0    | 1 |   |  |
| 100 | 4    | Li he           | 3 | 0    | 1 |   |  |
| 101 | 4    | Li shangyin     | 3 | 0    | 1 |   |  |
| 102 | 4    | Yi hang         | 2 | 23   | 1 |   |  |
| 103 | 4    | Wu daozi        | 3 | 0    | 1 |   |  |
| 104 | 5    | Shi shouxin     | 2 | 67   | 1 |   |  |
| 105 | 5    | Lv mengzheng    | 3 | 290  | 1 |   |  |
| 106 | 5    | Niu gao         | 3 | 56   | 1 |   |  |
| 107 | 5    | Chen tuan       | 2 | 188  | 1 |   |  |
| 108 | 5    | Shao yong       | 3 | 22   | 1 |   |  |
| 109 | 5    | He zhu          | 3 | 0    | 1 |   |  |
| 110 | 5    | Li jie          | 3 | 0    | 1 |   |  |
| 111 | 5    | Zhu dunru       | 2 | 0    | 1 |   |  |
| 112 | MING | Wang tingxiang  | 3 | 247  | 1 |   |  |
| 113 | MING | Zhu zaiyu       | 2 | 0    | 1 |   |  |
| 114 | MING | Wang duo        | 3 | 0    | 1 |   |  |
| 115 | QING | Zhang boxing    | 2 | 0    | 1 |   |  |
| 116 | QING | Tang bin        | 2 | 0    | 1 |   |  |
| 117 | QING | Hou fangyu      | 2 | 0    | 1 |   |  |
| 118 | QING | Wu qijun        | 2 | 0    | 1 |   |  |
| 119 | QING | Li wencheng     | 2 | 0    | 1 |   |  |
| 120 | QIN  | Li si           | 3 | 3100 |   | 1 |  |
| 121 | YUAN | Xu heng         | 3 | 3894 |   | 1 |  |
| 122 | MING | Shi kefa        | 3 | 1101 |   | 1 |  |

Note: In the dynasty column: 0= Before the Spring and Autumn Period and the Warring States Period;1=Spring-Autumn Period and Warring States Period;2= Han Dynasty;3= The Three Kingdoms and Jin and Southern and Northern Dynasties;4= Tang Dynasty;5= Song Dynasty

Note: "The total word of the text is less than 300 and excluded"; Fill 1 in the column to indicate that the corresponding person is excluded because the total word of the text is less than 300;

"Only one person in the dynasty was removed", filling 1 means that after the deletion of <300 words, only one person in the dynasty was removed;

Fill in 1 for "final selection" to indicate that the person was finally selected as a study subject.

There was no repetition of celebrities between dynasties.

## 2 Appendix II List of 47 Henan Historical Celebrities:

| The serial number | Birth history | Names of historical celebrities | Introduce                                                                                                                                                                        | Gender | Date of birth   |
|-------------------|---------------|---------------------------------|----------------------------------------------------------------------------------------------------------------------------------------------------------------------------------|--------|-----------------|
| 1                 | 1             | Lao Tzu                         | the founder of the Taoist school. born in Kuxian county of Chu (today's Luyi, Henan) during the Spring and Autumn Period                                                         | Male   | Unknown         |
| 2                 | 1             | Zi Gong                         | the ancestor of Chinese Confucian merchants, born in Wei (present-day Jun County, Henan)                                                                                         | Male   | BC520-Unknown   |
| 3                 | 1             | Mozi                            | Mozi, an outstanding thinker, educator and founder of mohist school, born in Lushan, Henan province                                                                              | Male   | BC468-BC376     |
| 4                 | 1             | Fan li                          | a famous statesman, strategist and merchant in ancient China, was honored as the saint of Commerce by later generations. born in Wan of Chu State (now Nanyang, Henan Province). | Male   | Unknown         |
| 5                 | 1             | Su qin                          | a famous strategist, born in Xuanli, Luoyang (today's Luoyang, Henan) during the Eastern Zhou Dynasty.                                                                           | Male   | Unknown - BC284 |
| 6                 | 1             | Zhang yi                        | a political strategist in the Warring States Period, born in the State of Wei (now Kaifeng, Henan province).                                                                     | Male   | Unknown - BC310 |
| 7                 | 1             | Zi Chan                         | A well-known politician, thinker, and pioneer of Legalism, Zichan, born in Zheng Guo (now Xinzheng, Henan).                                                                      | Male   | Unknown - BC520 |
| 8                 | 1             | Zhuangzi                        | Famous thinker, philosopher, Taoist school representative Zhuangzi, Meng of Song state, born in Min Quan County, Henan province. Also called ZhuangZhou.                         | Male   | BC369-BC286     |

|    |   |              |                                                                                                                                                                                                 |      |                 |
|----|---|--------------|-------------------------------------------------------------------------------------------------------------------------------------------------------------------------------------------------|------|-----------------|
| 9  | 1 | Lv buwei     | A famous businessman and statesman, born in Puyang city of Wei (in present-day Yanshi county, Henan Province). His tomb is located in Yanshi City, Luoyang                                      | Male | Unknown - BC235 |
| 10 | 1 | Han Fei      | the master of legalist thought, was a man of Korea in the late Warring States Period (now xinzheng, Henan province, has a different opinion)                                                    | Male | BC280-BC233     |
| 11 | 1 | Shang yang   | an outstanding statesman and reformer in ancient China, = born in the middle of the Warring States Period in Wei (now Neihuang, Henan)                                                          | Male | BC390-BC338     |
| 12 | 2 | Chen ping    | the founder of the Western Han Dynasty and a famous strategist, was a man of Yangwu (now Yuan Yang, Henan, has a different opinion)                                                             | Male | Unknown - BC178 |
| 13 | 2 | Zhang liang  | one of the three outstanding statesmen and strategists in the late Qin and early Han Dynasties, was a native of Baofeng, Henan province. has a different opinion.                               | Male | Unknown - BC185 |
| 14 | 2 | Cao cuo      | The Western Han Dynasty statesman, a native of Yingchuan (now Yuzhou, Henan), has the tomb on the west side of the Martyrs Cemetery in Xuchang.                                                 | Male | BC200-BC154     |
| 15 | 2 | Zhang shizhi | who was famous for his impartial law enforcement, was born in Duyang (now south of Henan) in the Western Han Dynasty. There are Shizhi Zhang's Tomb and Shizhi Zhang's Temple in Fangcheng now. | Male | Unknown         |
| 16 | 2 | Jia yi       | an outstanding political commentator and writer in the early Western Han Dynasty, was from Luoyang.                                                                                             | Male | BC200-BC168     |
| 17 | 2 | Feng yi      | the founding hero of the Eastern Han Dynasty and a famous military strategist, born in Yingchuan Father City (now Baofeng, Henan), and his tomb is in Baofeng County today.                     | Male | Unknown -34     |
| 18 | 2 | Yuan shao    | Shu Yuan and Shao Yuan, the heroes of the late Han Dynasty, were both from Runan Ruyang (now Shangshui, Henan).                                                                                 | Male | Unknown -202    |
| 19 | 2 | Xun you      | Father Xun Yi (yi) is Xun Yu's uncle brother                                                                                                                                                    | Male | 157-214         |
| 20 | 2 | Xun yu       | An outstanding politician, strategist, Cao Cao adviser Xun or, from Yingchuan Yingyin (now Xuchang, Henan).                                                                                     | Male | 162-212         |

|    |   |             |                                                                                                                                                                                                          |      |         |
|----|---|-------------|----------------------------------------------------------------------------------------------------------------------------------------------------------------------------------------------------------|------|---------|
| 21 | 2 | Cai yong    | Famous writer and calligrapher, Liuyu people of Chen(now Qixian County, Henan Province, or Weishi County).                                                                                               | Male | 132-192 |
| 22 | 2 | Zhang heng  | An outstanding scientist and writer in ancient times, known as the saint of science, born in Xi'e, Nanyang (now Shiqiao Town, Nanyang City, Henan)                                                       | Male | 78-139  |
| 23 | 3 | Sina yi     | An outstanding statesman and military strategist in the Wei Kingdom, he founder of the Western Jin Dynasty, born in Wen County, Hanoi (now Wen County, Henan)                                            | Male | 179-251 |
| 24 | 3 | Deng ai     | an outstanding military strategist and general of the Wei Kingdom, born in Jiyang (now Xinye, Henan) in Yiyang.                                                                                          | Male | 197-264 |
| 25 | 3 | Ruan ji     | a writer of the Wei Dynasty and one of the seven sages of the bamboo forest, born in the Wei clan of Chenliu (now Weishi, Henan). There are Ji Ruan tomb and Ji Ruan shouting platform in current Weishi | Male | 210-263 |
| 26 | 3 | Zhong yao   | a famous calligrapher and politician in Cao Wei .He was the ancestor of calligraphy history and the originator of regular script,born in Yingchuan Changshe (now Changge, Henan).                        | Male | 151-230 |
| 27 | 3 | Wang jun    | born in Hu County, Hongnong County (now Lingbao City, Henan Province). Famous general in the Western Jin Dynasty.                                                                                        | Male | 206-285 |
| 28 | 3 | Xie xuan    | a famous general in the Eastern Jin Dynasty, born in Taikang, Henan.                                                                                                                                     | Male | 343-388 |
| 29 | 3 | Pan yue     | a writer and beautiful man, born in Zhongmu (now Zhongmu County, Henan).                                                                                                                                 | Male | 247-300 |
| 30 | 3 | Xie lingyun | the founder of the School of Landscape Poetry in the history of Chinese literature, and the great historical traveler,born in Taikang.                                                                   | Male | 385-433 |
| 31 | 3 | Fan ye      | The famous historian and writer, born in Shunyang (now Xichuan, Henan) in the Southern Song Dynasty.                                                                                                     | Male | 398-445 |
| 32 | 3 | Fan zhen    | a thinker and outstanding atheist in the Southern Dynasties between Qi and Liang, was from Nanxiang Wuyin (now Biyang, Henan) (with different opinions)                                                  | Male | 450-510 |
| 33 | 3 | Jiang yan   | Famous minister of Qiliang in the Southern Dynasties, famous writer, with allusions such as the brilliant writing of flowers, Jiang Lang, etc., a native of Jiyang Kaocheng (now Henan Minquan)          | Male | 444-505 |

|    |   |            |                                                                                                                                                                          |      |           |
|----|---|------------|--------------------------------------------------------------------------------------------------------------------------------------------------------------------------|------|-----------|
| 34 | 4 | Yao chong  | a famous minister known as the prime minister at the time of rescue, was from Xiashi, Shanzhou (now Shanxian County, Henan).                                             | Male | 650-721   |
| 35 | 4 | Liu rengui | Minister and famous military general, from Zhou Weishi (now Weishi, Henan).                                                                                              | Male | 601-685   |
| 36 | 4 | Wu jing    | born in Bianzhou Junyi (now Kaifeng, Henan). Minister of the Tang Dynasty, a famous historian.                                                                           | Male | 670-749   |
| 37 | 4 | Zhang xun  | Born in Nanyang, Dengzhou in "New Tang Book". Famous minister in the middle of Tang Dynasty.                                                                             | Male | 709-757   |
| 38 | 4 | Zhang shuo | Literary and politician,originally from Fanyang and later moved to Luoyang, Henan.                                                                                       | Male | 667-730   |
| 39 | 4 | Bai juyi   | The well-known realist poet,born in Xinzheng, Henan.                                                                                                                     | Male | 772-846   |
| 40 | 4 | Yuan jie   | pioneer of the ancient prose movement and writer Yuan Jie, born in Lushan, Henan.                                                                                        | Male | 719-772   |
| 41 | 4 | Han yu     | Outstanding writer, thinker and politician, from Heyang (now Mengzhou, Henan), Hanoi (with different opinions)                                                           | Male | 768-824   |
| 42 | 4 | Liu yuxi   | The famous poet, known as a poet, born in Luoyang (with different terms).                                                                                                | Male | 772-842   |
| 43 | 4 | Wang jian  | written as Zhongchu, born in Yingchuan, Xuzhou (now Xuchang City, Henan Province), minister and poet of the Tang Dynasty.                                                | Male | 767-830   |
| 44 | 4 | Yuan zhen  | Famous poet Yuan Zhen, from Luoyang                                                                                                                                      | Male | 779-831   |
| 45 | 4 | Zhao pu    | The famous minister, born in Ji County, Youzhou (now Beijing), and later moved to Changshan (now Zhengding, Hebei) and Luoyang (now Luoyang, Henan).                     | Male | 922-992   |
| 46 | 4 | Sima guang | a politician, writer, and historian, born in Sushui Township, Xia County, Shanxi Province, and born in Guangshan County, Henan Province.                                 | Male | 1019-1086 |
| 47 | 4 | Yue fei    | a famous strategist, military strategist, and anti-gold warrior in my country's history, born in Tangyin (now Tangyin, Henan Province) in Xiangzhou in the Northern Song | Male | 1103-1142 |

Note:1=Spring-Autumn Period and Warring States Period;2= Han Dynasty;3= The Three Kingdoms and Jin and Southern and Northern Dynasties;4= Tang Dynasty;5= Song Dynasty

### 3 Appendix III Statistical Data of text Analysis of Historical Celebrities in Henan:

| 序号 | 朝代 | 名人姓名 | TCC | TWC | LWC | LCR |
|----|----|------|-----|-----|-----|-----|
|----|----|------|-----|-----|-----|-----|

|    |   |              |       |       |       |        |
|----|---|--------------|-------|-------|-------|--------|
| 1  | 1 | Lao Tzu      | 8735  | 6820  | 5633  | 82.60% |
| 2  | 1 | Zi Gong      | 952   | 700   | 576   | 82.29% |
| 3  | 1 | Mozi         | 11899 | 9365  | 7663  | 81.83% |
| 4  | 1 | Fan li       | 629   | 450   | 346   | 76.89% |
| 5  | 1 | Su qin       | 7309  | 5644  | 4317  | 76.49% |
| 6  | 1 | Zhang yi     | 5039  | 3830  | 2885  | 75.33% |
| 7  | 1 | Zi Chan      | 2416  | 1838  | 1393  | 75.79% |
| 8  | 1 | Zhuangzi     | 3057  | 2388  | 1867  | 78.18% |
| 9  | 1 | Lv buwei     | 544   | 394   | 310   | 78.68% |
| 10 | 1 | Han Fei      | 67701 | 53813 | 41888 | 77.84% |
| 11 | 1 | Shang yang   | 670   | 517   | 410   | 79.30% |
| 12 | 2 | Chen ping    | 593   | 437   | 339   | 77.57% |
| 13 | 2 | Zhang liang  | 993   | 729   | 551   | 75.58% |
| 14 | 2 | Cao cuo      | 4310  | 3190  | 2411  | 75.58% |
| 15 | 2 | Zhang shizhi | 315   | 224   | 172   | 76.79% |
| 16 | 2 | Jia yi       | 7335  | 5517  | 4277  | 77.52% |
| 17 | 2 | Feng yi      | 443   | 314   | 227   | 72.29% |
| 18 | 2 | Yuan shao    | 1340  | 934   | 638   | 68.31% |
| 19 | 2 | Xun you      | 334   | 257   | 196   | 76.26% |
| 20 | 2 | Xun yu       | 1317  | 983   | 766   | 77.92% |
| 21 | 2 | Cai yong     | 2928  | 2084  | 1507  | 72.31% |
| 22 | 2 | Zhang heng   | 1058  | 762   | 566   | 74.28% |
| 23 | 3 | Sina yi      | 1041  | 783   | 602   | 76.88% |
| 24 | 3 | Deng ai      | 954   | 720   | 534   | 74.17% |
| 25 | 3 | Ruan ji      | 1034  | 731   | 491   | 67.17% |
| 26 | 3 | Zhong yao    | 394   | 306   | 232   | 75.82% |
| 27 | 3 | Wang jun     | 442   | 309   | 210   | 67.96% |
| 28 | 3 | Xie xuan     | 785   | 577   | 410   | 71.06% |
| 29 | 3 | Pan yue      | 440   | 317   | 213   | 67.19% |
| 30 | 3 | Xie lingyun  | 310   | 232   | 171   | 73.71% |
| 31 | 3 | Fan ye       | 377   | 276   | 208   | 75.36% |
| 32 | 3 | Fan zhen     | 1291  | 1043  | 827   | 79.29% |
| 33 | 3 | Jiang yan    | 956   | 679   | 490   | 72.16% |
| 34 | 4 | Yao chong    | 992   | 749   | 563   | 75.17% |
| 35 | 4 | Liu rengui   | 360   | 263   | 197   | 74.90% |
| 36 | 4 | Wu jing      | 1380  | 971   | 693   | 71.37% |
| 37 | 4 | Zhang xun    | 396   | 303   | 242   | 79.87% |
| 38 | 4 | Zhang shuo   | 1021  | 737   | 515   | 69.88% |
| 39 | 4 | Bai juyi     | 10554 | 7890  | 6090  | 77.19% |
| 40 | 4 | Yuan jie     | 1328  | 980   | 722   | 73.67% |
| 41 | 4 | Han yu       | 3059  | 2128  | 1580  | 74.25% |
| 42 | 4 | Liu yuxi     | 302   | 206   | 137   | 66.50% |
| 43 | 4 | Wang jian    | 397   | 281   | 203   | 72.24% |
| 44 | 4 | Yuan zhen    | 2613  | 1880  | 1412  | 75.11% |



|    |   |            |      |      |      |        |
|----|---|------------|------|------|------|--------|
| 45 | 5 | Zhao pu    | 852  | 594  | 406  | 68.35% |
| 46 | 5 | Sima guang | 5498 | 4028 | 3108 | 77.16% |
| 47 | 5 | Yue fei    | 1841 | 1348 | 1002 | 74.33% |

Note: In the dynasty column: 0= Before the Spring and Autumn Period and the Warring States Period;1=Spring-Autumn Period and Warring States Period;2= Han Dynasty;3= The Three Kingdoms and Jin and Southern and Northern Dynasties;4= Tang Dynasty;5= Song Dynasty

Note: TCC is the number of words in the article (excluding punctuation marks), TWC is the total number of words in the article after word segmentation, LWC is the number of LIWC words included in the article, and LCR is the LIWC coverage rate of the article (namely, the number of LIWC words divided by the total number of words in the article).

#### 4 Appendix IV Post-test of the Difference of Word Frequency of Historical Celebrities in Henan in Different Dynasties:

| dependent variable | (I) dynasties | (J) dynasties | average difference (I-J) | Significance |
|--------------------|---------------|---------------|--------------------------|--------------|
| male               | 1.0           | 2.0           | .00989                   | .029*        |
|                    |               | 3.0           | .01359                   | .003**       |
|                    |               | 4.0           | .00967                   | .033*        |
|                    |               | 5.0           | .01500                   | .030*        |
|                    | 2.0           | 3.0           | .00370                   | .403         |
|                    |               | 4.0           | -.00022                  | .960         |
|                    |               | 5.0           | .00510                   | .450         |
|                    | 3.0           | 4.0           | -.00392                  | .376         |
|                    |               | 5.0           | .00140                   | .835         |
|                    | 4.0           | 5.0           | .00532                   | .430         |
| differ             | 1.0           | 2.0           | .01204                   | .014*        |
|                    |               | 3.0           | .01799                   | .000**       |
|                    |               | 4.0           | .01682                   | .001**       |
|                    |               | 5.0           | .01635                   | .027*        |
|                    | 2.0           | 3.0           | .00594                   | .211         |
|                    |               | 4.0           | .00477                   | .313         |
|                    |               | 5.0           | .00430                   | .550         |
|                    | 3.0           | 4.0           | -.00117                  | .804         |
|                    |               | 5.0           | -.00164                  | .819         |
|                    | 4.0           | 5.0           | -.00047                  | .947         |
| motion             | 1.0           | 2.0           | -.00828                  | .077         |
|                    |               | 3.0           | -.01216                  | .011*        |
|                    |               | 4.0           | -.01639                  | .001**       |
|                    |               | 5.0           | -.01850                  | .011*        |
|                    | 2.0           | 3.0           | -.00389                  | .399         |
|                    |               | 4.0           | -.00812                  | .082         |
|                    |               | 5.0           | -.01022                  | .150         |
|                    | 3.0           | 4.0           | -.00423                  | .359         |
|                    |               | 5.0           | -.00633                  | .368         |
|                    | 4.0           | 5.0           | -.00211                  | .764         |
| time               | 1.0           | 2.0           | -.00341                  | .359         |
|                    |               | 3.0           | -.01417                  | .000**       |

|     |     |         |        |
|-----|-----|---------|--------|
|     | 4.0 | -.01198 | .002** |
|     | 5.0 | -.01317 | .024*  |
| 2.0 | 3.0 | -.01077 | .005** |
|     | 4.0 | -.00857 | .024*  |
|     | 5.0 | -.00976 | .089   |
| 3.0 | 4.0 | .00219  | .554   |
|     | 5.0 | .00100  | .859   |
| 4.0 | 5.0 | -.00119 | .833   |

Note: \*p<0.05, \*\*p<0.01。

## 5 Appendix V Notes on Chinese Proper Nouns:

| Noun:                                               | paraphrase                                                                                                                                                                                                                                                                                                                                                                                                                                                                                                                                                                                                                                                                                                                                                                                                                                                                           |
|-----------------------------------------------------|--------------------------------------------------------------------------------------------------------------------------------------------------------------------------------------------------------------------------------------------------------------------------------------------------------------------------------------------------------------------------------------------------------------------------------------------------------------------------------------------------------------------------------------------------------------------------------------------------------------------------------------------------------------------------------------------------------------------------------------------------------------------------------------------------------------------------------------------------------------------------------------|
| Schools of thought contend                          | The contending of a hundred schools of thought refers to the emergence of different schools of thought among intellectuals in the Spring and Autumn Period (770-476 BC) and the Warring States Period (475-221 BC), as well as the contending among various family schools.                                                                                                                                                                                                                                                                                                                                                                                                                                                                                                                                                                                                          |
| Scholar                                             | Generally refers to the folk talents with a certain ability, Confucius put forward the theoretical standard of scholar: as long as the person who is strict with himself, loyal to the monarch and patriotic. As a low-level aristocrat, a scholar has the right to rule the common people and the obligation to defend the country. Its embryonic stage, is the lowest in the ancient aristocratic class a group. And the lowest layer in this group is connected with the plebeian.                                                                                                                                                                                                                                                                                                                                                                                                |
| clan                                                | In primitive society, the collective of people connected by blood relations, marriage was forbidden within the clan, and the collective possession of means of production, collective production and collective consumption were carried out collectively. Also called a gens commune.                                                                                                                                                                                                                                                                                                                                                                                                                                                                                                                                                                                               |
| KungYang Chuan •<br>The First Year of<br>Cheng Gong | The Warring States Period of Qi people Ram Gao Zhuan. It is a special interpretation of the Spring and Autumn Annals. Its date is the same as that of the Annals of Spring and Autumn Annals, that is, from 722 to 481 BC. The interpretation of the Annals of Spring and Autumn is very brief and focuses on elucidating the principles of Confucius' Annals of Spring and Autumn. Gongyang Zhuan is an important scripture in the study of New Text Confucianism, with strong didacticism and relatively low literary value. The scholars of New Text Confucianism often use it as a tool to discuss politics.                                                                                                                                                                                                                                                                     |
| Book of Rites •<br>Book of Learning                 | It is a treatise on education in ancient China. It is one of the books of the Book of Rites (Book of Little Dai Rites), a monobook on ancient Chinese laws and regulations. It is the earliest book in world history that specifically discusses education and teaching issues. It is generally considered to be a work of the Si Meng School in the late Warring States Period of China. According to Guo Moruo's textual research, the author is Le Zhengke. The text is concise and comprehensive, and the metaphor is vivid. It systematically and comprehensively clarifies the purpose and function of education, teachers' status and role, and the relationship between teachers and students in the process of education and the relationship between the classmate, more systematic and comprehensive summary and sums up the Chinese pre-qin period education experience. |

|                                         |                                                                                                                                                                                                                                                                                                                                                                                                                                                                                                                                                                                                                                                                                                                                                                                                                                                                                                                                                                                                                                                                                                                                                            |
|-----------------------------------------|------------------------------------------------------------------------------------------------------------------------------------------------------------------------------------------------------------------------------------------------------------------------------------------------------------------------------------------------------------------------------------------------------------------------------------------------------------------------------------------------------------------------------------------------------------------------------------------------------------------------------------------------------------------------------------------------------------------------------------------------------------------------------------------------------------------------------------------------------------------------------------------------------------------------------------------------------------------------------------------------------------------------------------------------------------------------------------------------------------------------------------------------------------|
| National Language<br>• Qi Language      | Guoyu mainly records the opinions of the aristocrats from the late Western Zhou Dynasty to the Spring and Autumn Period. It portrays the characters' personalities, expresses the thoughts and fates of different characters, and records the magnificent historical events through the language with different styles and characteristics. Writing history in language is vivid and concise, which has been praised by all generations. It is the earliest national history in ancient China.                                                                                                                                                                                                                                                                                                                                                                                                                                                                                                                                                                                                                                                             |
| "Tao"                                   | Tao is a noun used by the Chinese people for understanding nature. It means the running track or trajectory of everything, or the changing and moving situation of things. Because all things are not things, coincidentally, uniform adherence to a certain thing, without exception.                                                                                                                                                                                                                                                                                                                                                                                                                                                                                                                                                                                                                                                                                                                                                                                                                                                                     |
| "love each other" and "mutual benefit", | In Mozi's thought, "loving each" refers to "other simultaneously" and "loving each other without discrimination", which means to love all people without discrimination, such as those close to each other, high or low, rich or poor. "Mutual benefit" refers to "mutual thief", which advocates that people help each other, seek welfare, and oppose competing with each other. The essence of Mozi's thought of "mutual love and mutual benefit" is a kind of flexible management, it is through the interaction between people love each other to improve interpersonal relationship, eliminate the destructive conflict, create a good social environment, make people to love, which can satisfy the interests of everyone, this accords with the need of naturalness, and conforms to the social moral laws.                                                                                                                                                                                                                                                                                                                                       |
| "The Supremacy of Confucianism"         | It was Dong Zhongshu's idea of ruling a country, which was put forward in the first year of Yuanguang (134 B. C.), and put into practice during the reign of Emperor Wudi of the Han Dynasty. It is the feudal ideological rule policy implemented by Emperor Wudi of the Western Han Dynasty, and it is also the symbol that Confucianism occupies the dominant position in Chinese culture.                                                                                                                                                                                                                                                                                                                                                                                                                                                                                                                                                                                                                                                                                                                                                              |
| The metaphysics                         | During the period of Wei and Jin Dynasties, the meaning of metaphysics refers to the two aspects of making speech and doing things, and most of them take making speech and doing things elegant as far as making speech and doing things elegant as far as making speech and doing things elegant. "Xuanyuan" refers to the ontological issues that are far away from the concrete things and specifically discuss the "transcendent words and unique images". The central issue of the discussion is the question of "whether there is an end or not", that is to say, the discussion on the basis of the existence of everything in heaven and earth by means of speculative method, that is to say, the discussion on the basis of the existence of everything in the form of ontology and metaphysics, which is far away from "things" and "affairs". It is the first attempt in the history of Chinese philosophy to make Chinese philosophy on the basis of a meaningful combination of Confucianism and Taoism. In philosophy, there are two schools of metaphysics, namely, gui-wu and chong-you, centered on whether there are questions or not. |
